# Supplementary material for: Autophagy is induced and supports virus replication in Enterovirus A71-infected human primary neuronal cells
Source: PubMed Central journal article supplement (PMC7499237; doi:10.1038/s41598-020-71970-3), 2020-09-17

**Autophagy is induced and supports virus replication in Enterovirus A71-infected human primary neuronal cells**

Jhao-Yin Lin<sup>1,2</sup> and Hsing-I Huang<sup>1,2,3</sup>

<sup>1</sup> Research Center for Emerging Viral Infections, College of Medicine, Chang Gung University, Kwei-Shan, Tao-Yuan, Taiwan

<sup>2</sup> Department of Medical Biotechnology and Laboratory Science, College of Medicine, Chang Gung University, Kwei-Shan, Tao-Yuan, Taiwan

<sup>3</sup> Department of Pediatrics, Chang Gung Memorial Hospital, Linkou, Taiwan

\*Corresponding author: Dr. Hsing-I Huang    E-mail: [hihuang@mail.cgu.edu.tw](mailto:hihuang@mail.cgu.edu.tw)

Figure 2F

EV-A71 3D, actin

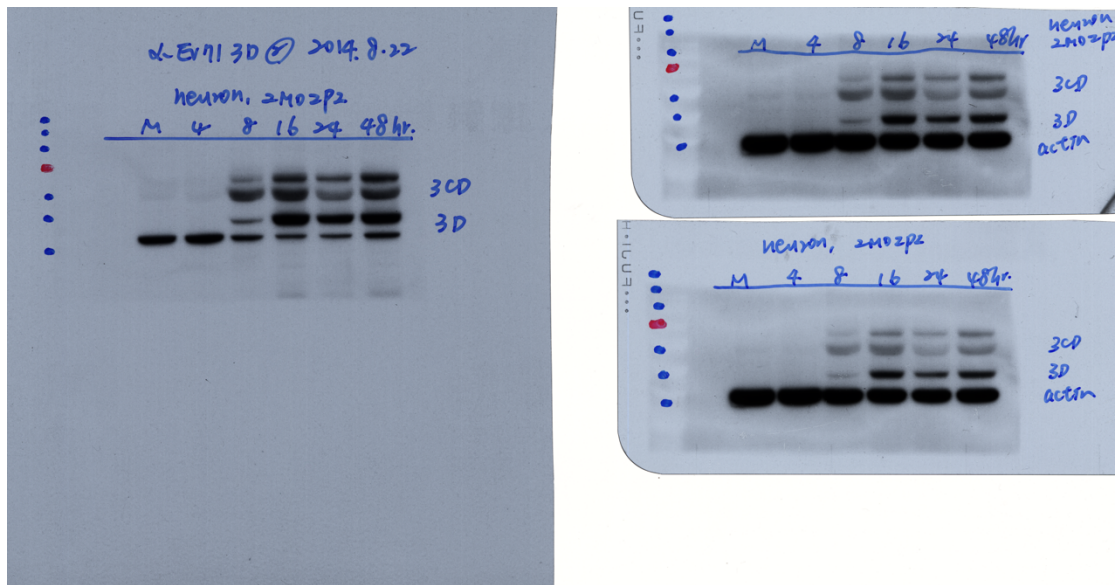

Figure 3B  
caspase 3

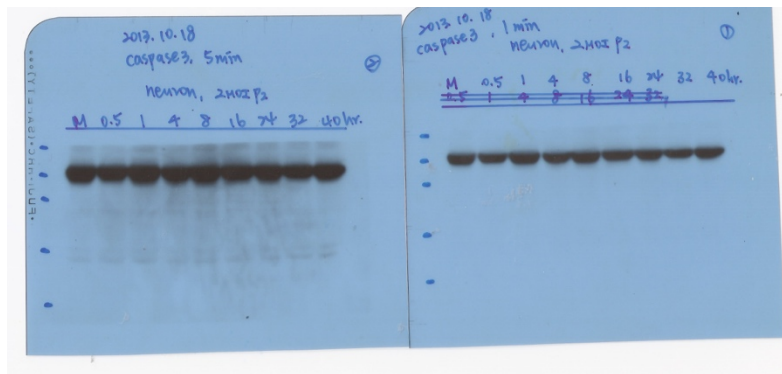

EV-A71 3D, actin

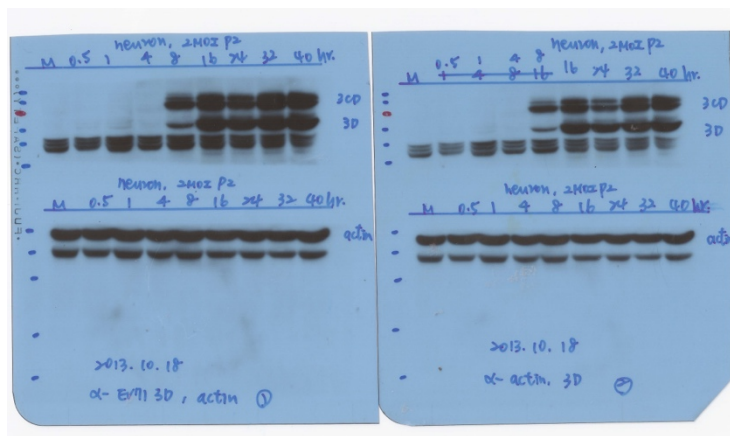

Figure 3C  
caspase 3

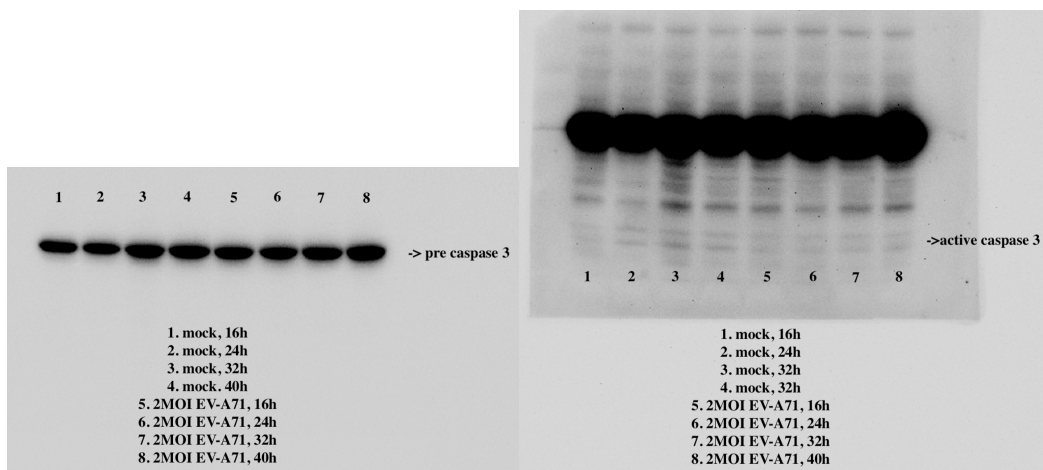

# EV-A71 3D

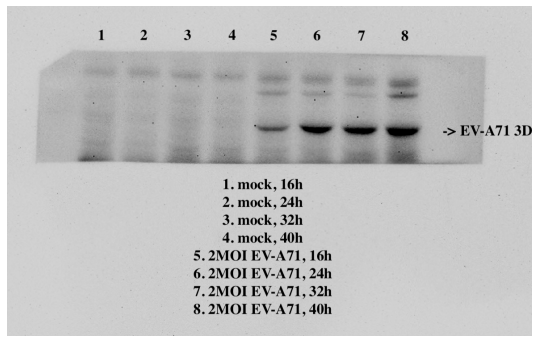

# actin

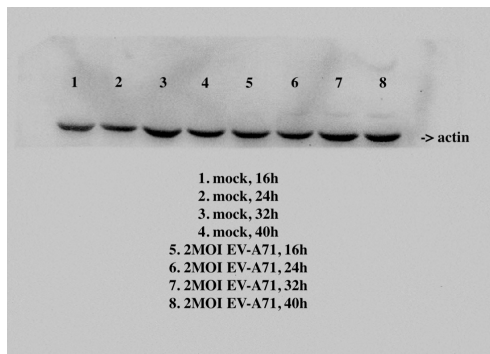

# Figure 3D

## caspase 9, caspase 8

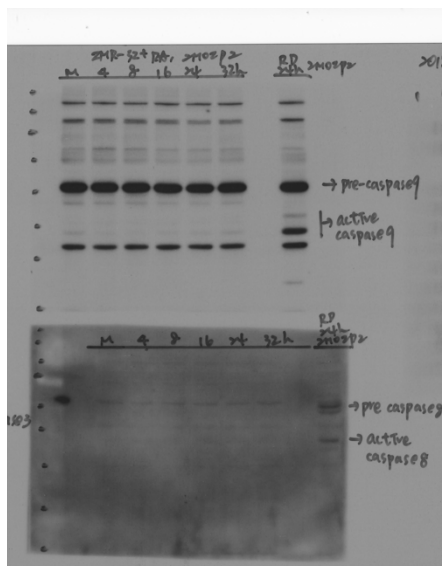

# EV-A71 3D

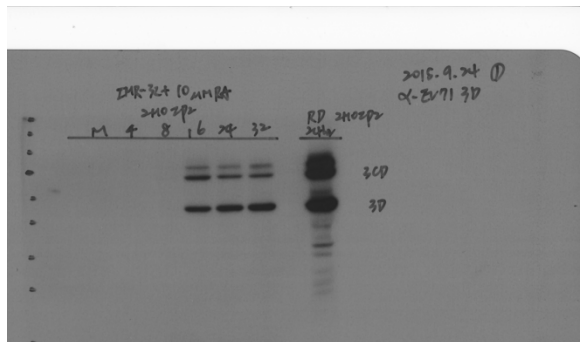

# actin

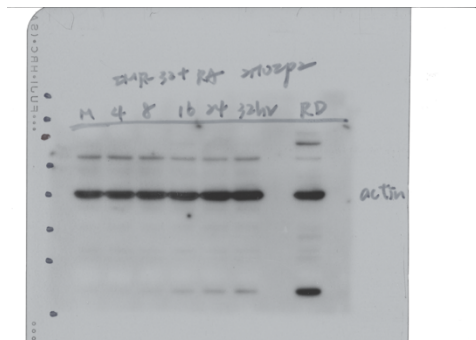

Figure 4C

LC3

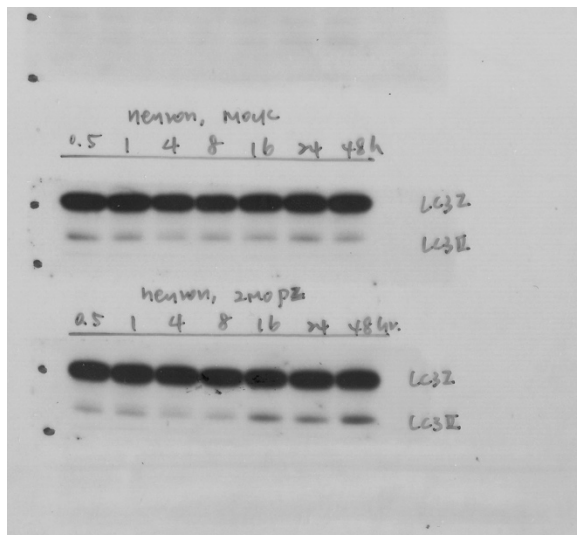

EV-A71 3D

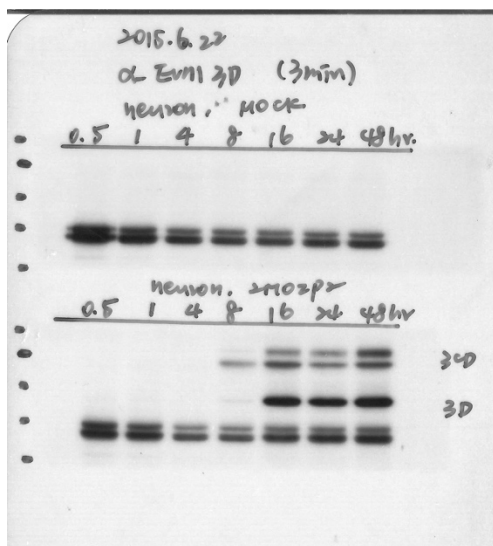

actin

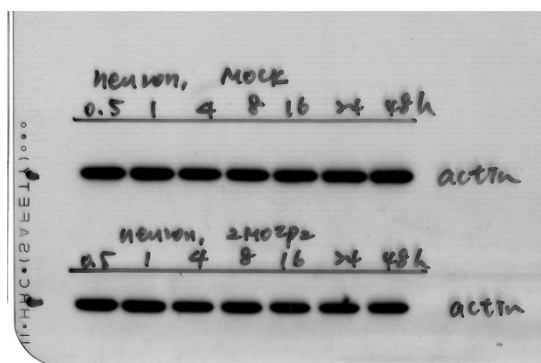

Figure 4E

LC3 I/ LC3II

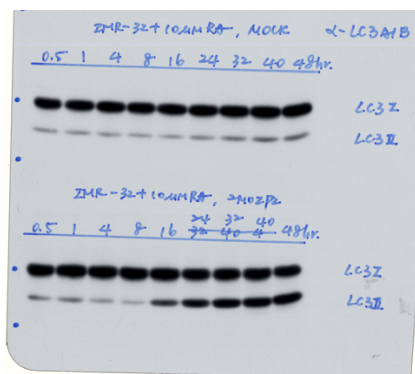

EV-A71 3D, actin

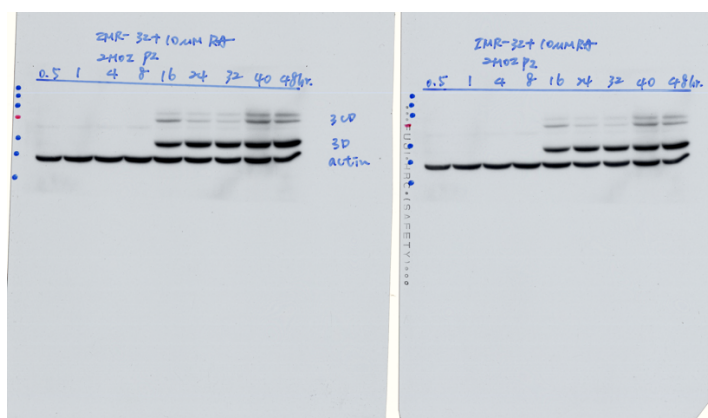

Figure 4G

Phospho-Beclin1 S15

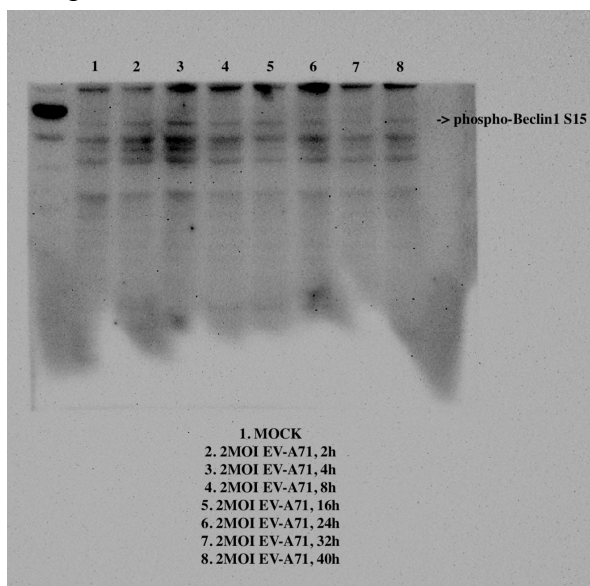

## Total Beclin1

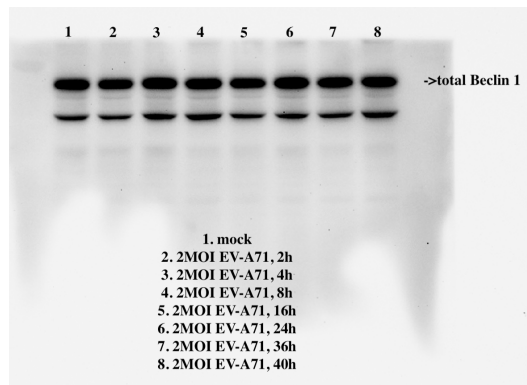

## EV-A71 3D

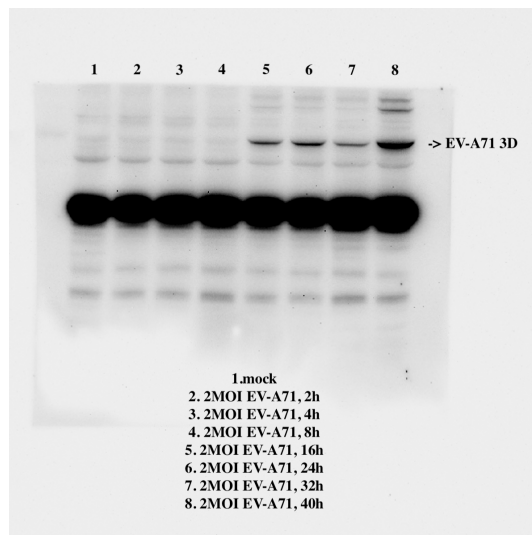

## actin

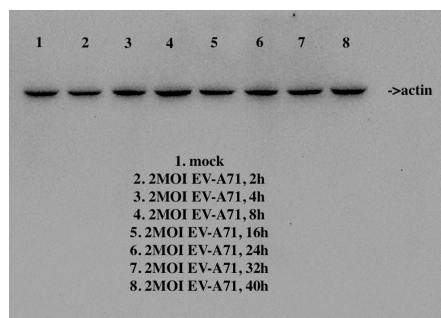



Figure 5A

p62

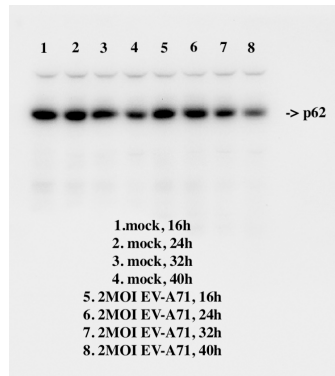

EV-A71 3D

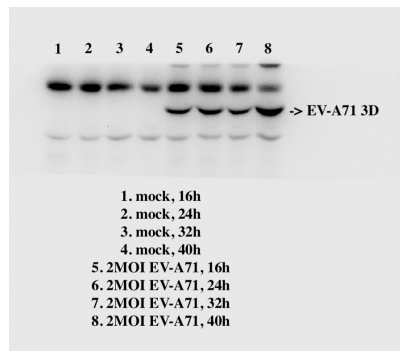

actin

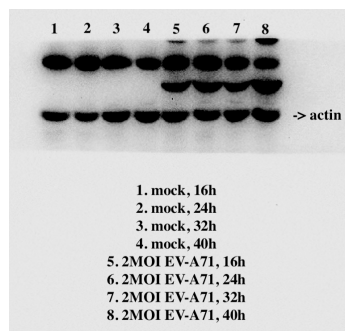

Figure 5E  
LC3 I/ LC3II

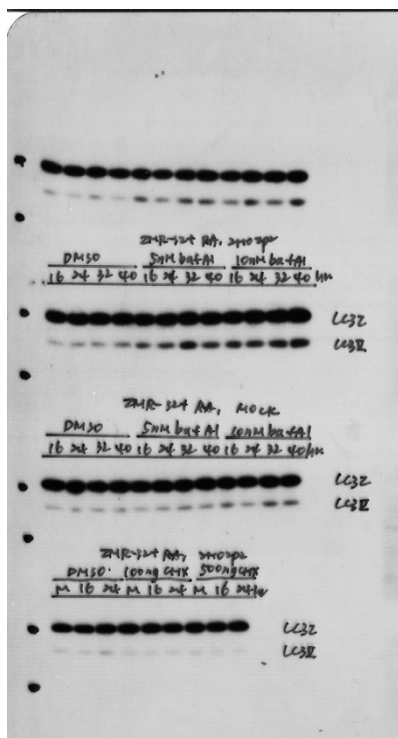

EV-A71 3D

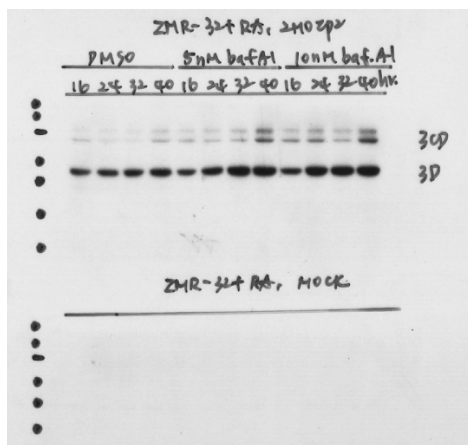

actin

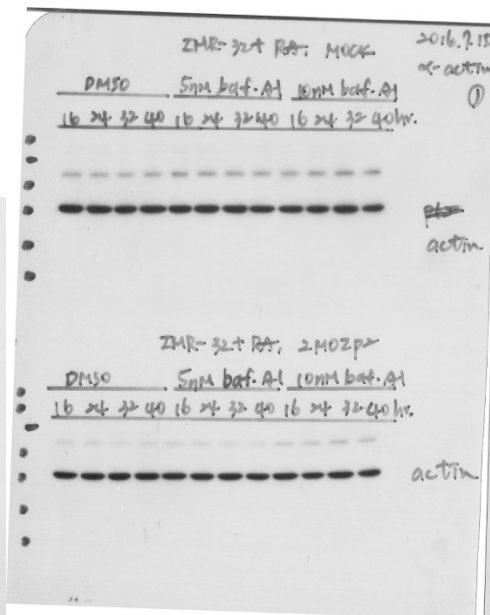

Figure 5G  
LC3 I/ LC3II

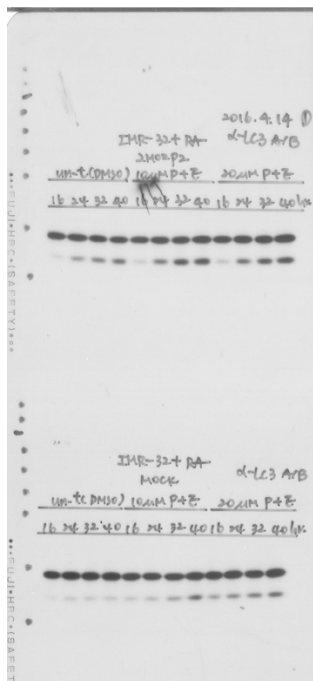

EV-A71 3D

actin

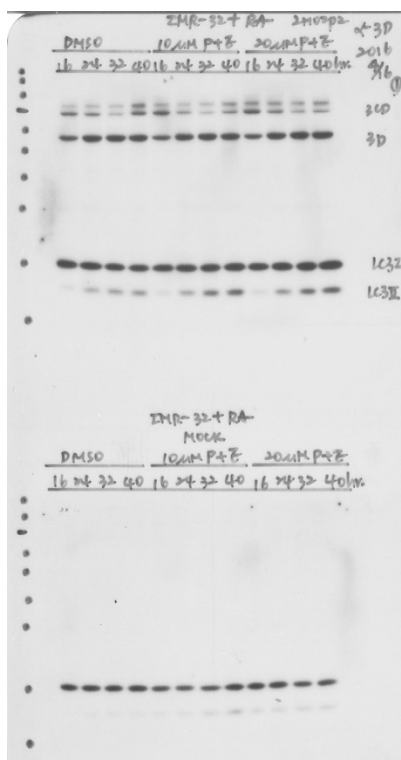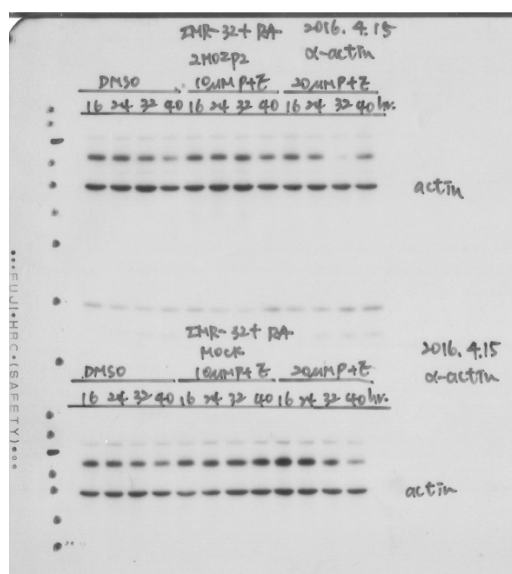

Figure 6A

LC3I/ LC3II

EV-A71 3D

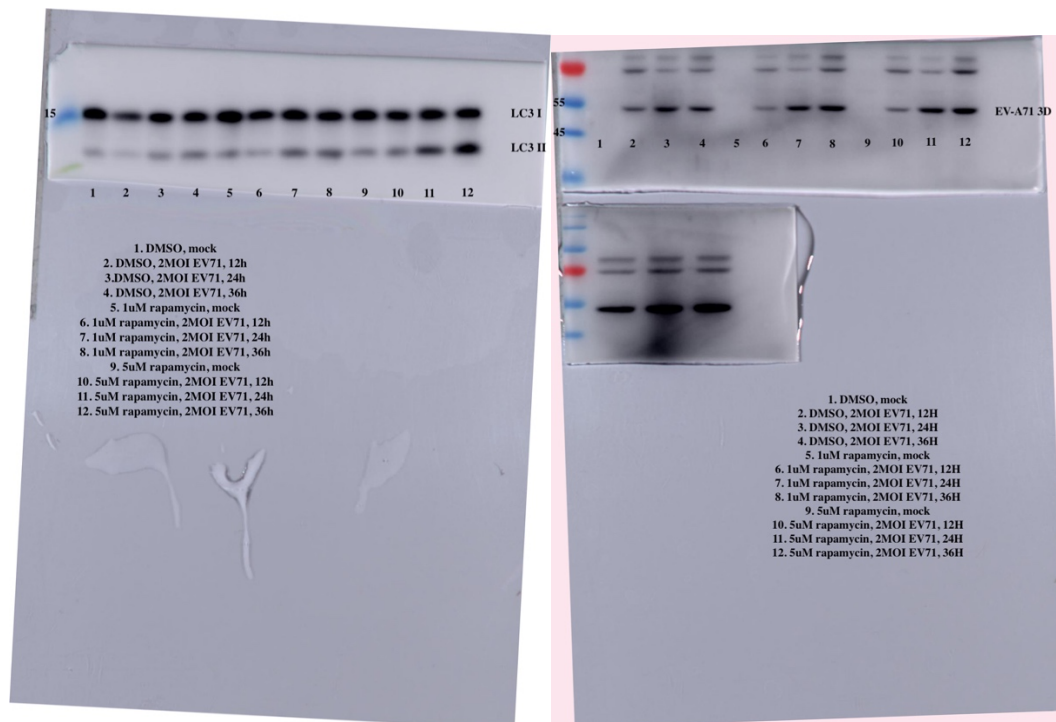

actin

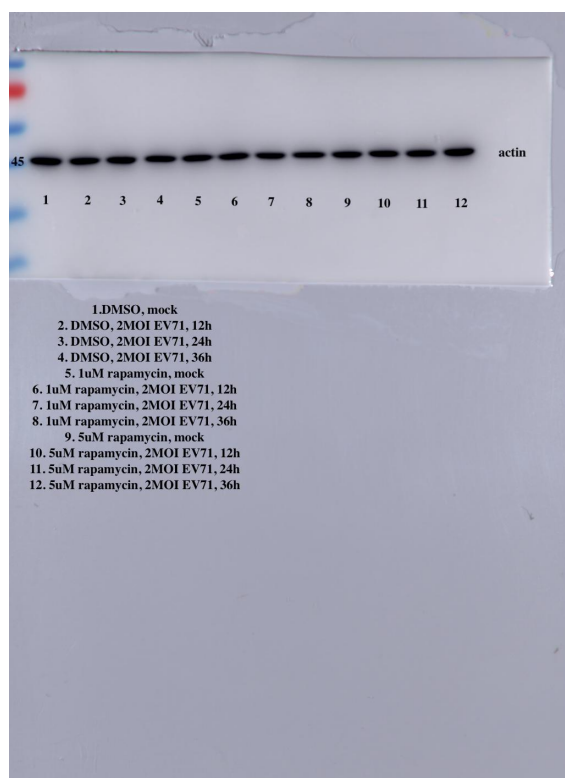

Figure 6C

LC3I/ LC3II

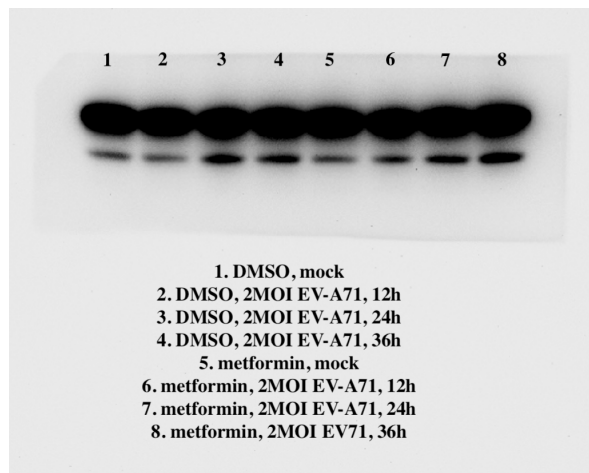

EV-A71 3D

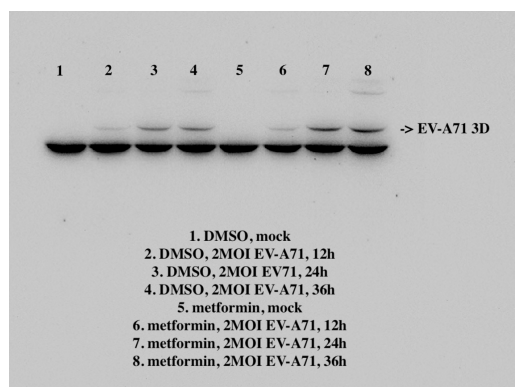

actin

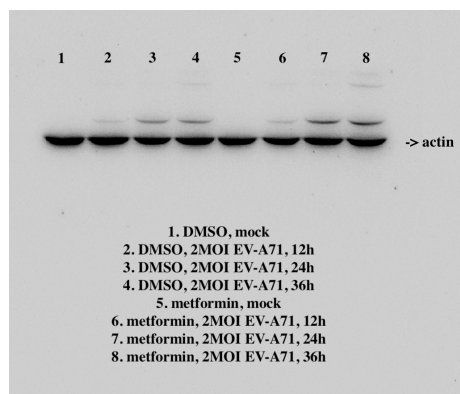

Figure 6F  
ATG5

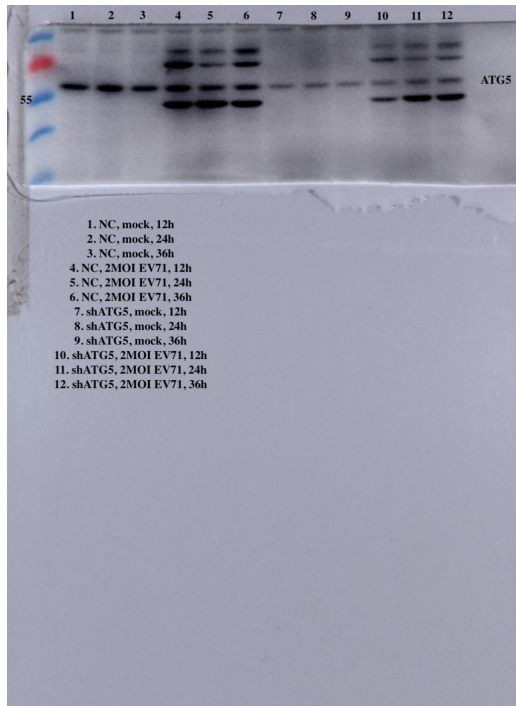

LC3I/ LC3 II

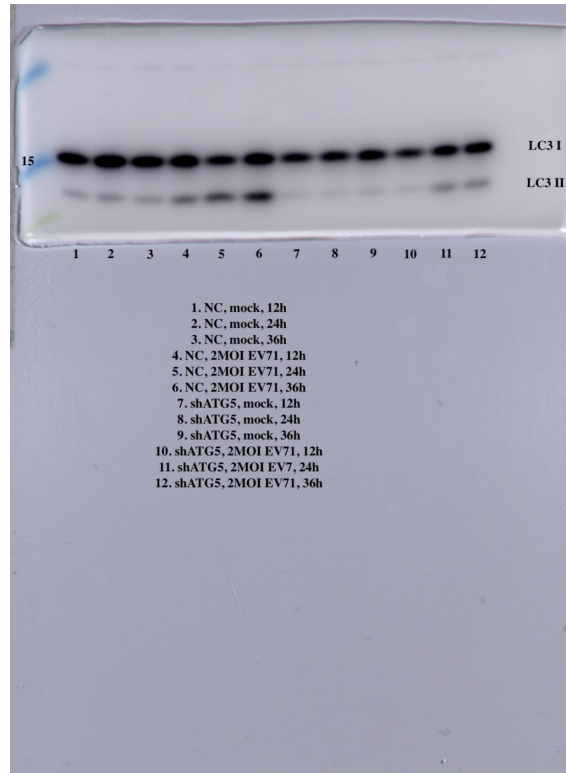

EV-A71 3D

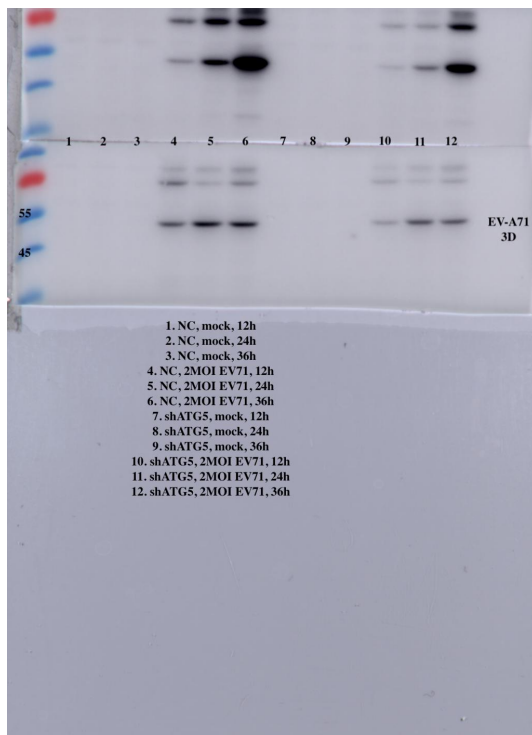

actin

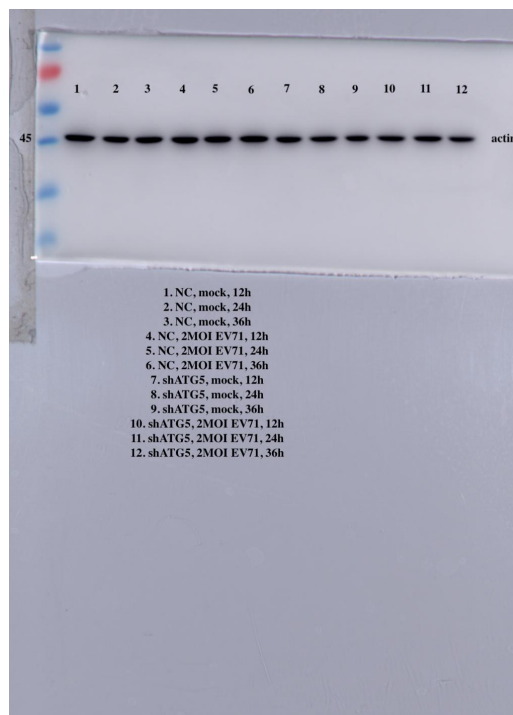

Figure S3A  
LC3-I/LC3-II

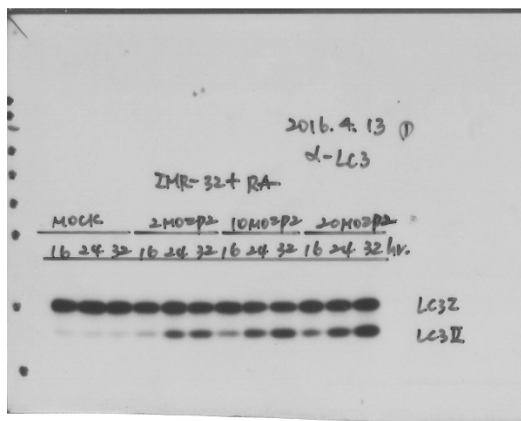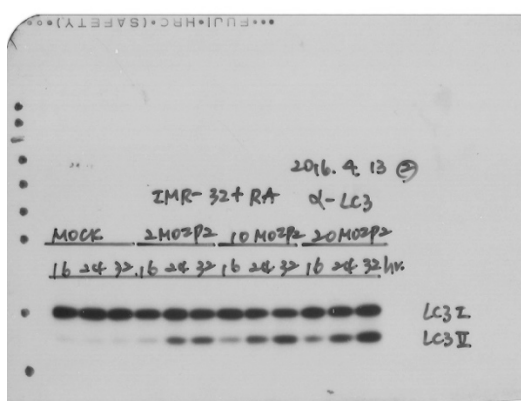

EV-A71 3D

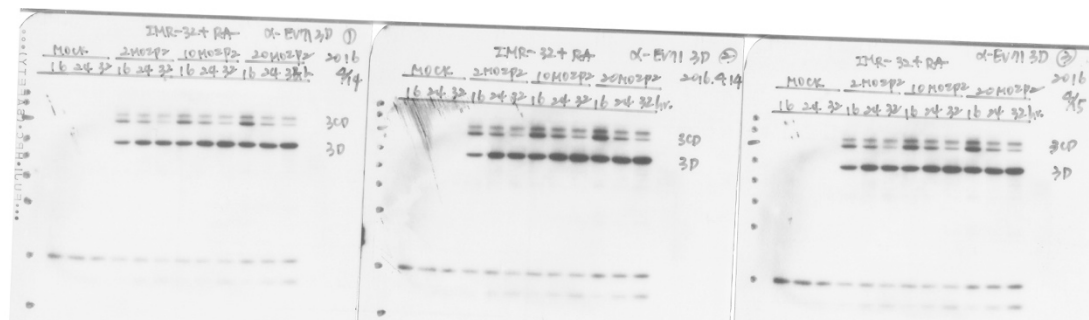

actin

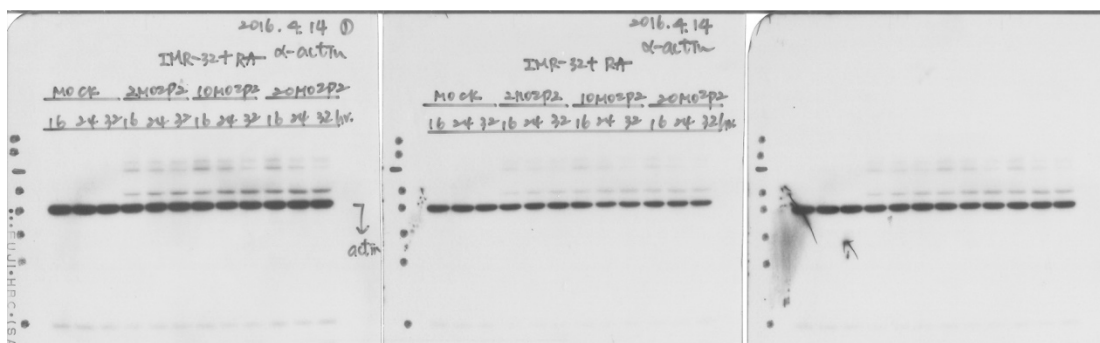

Supplement: 41598_2020_71970_MOESM2_ESM.pdf [file 41598_2020_71970_MOESM2_ESM.pdf]
